# Supplementary material for: AAV-8 and AAV-9 Vectors Cooperate with Serum Proteins Differently Than AAV-1 and AAV-6
Source: PubMed Central journal article supplement (PMC6111067; doi:10.1016/j.omtm.2018.08.001), 2018-08-08
Supplement: mmc1.pdf [file mmc1.pdf]

**OMTM, Volume 10**

## **Supplemental Information**

### **AAV-8 and AAV-9 Vectors Cooperate with Serum**

### **Proteins Differently Than AAV-1 and AAV-6**

**Jérôme Denard, Jérémy Rouillon, Thibaut Leger, Camille Garcia, Michele P. Lambert, Graziella Griffith, Christine Jenny, Jean-Michel Camadro, Luis Garcia, and Fedor Svinartchouk**

## Supplemental Information

**Supplemental Table 1. Primary antibodies used in the study**

| Protein                                          | Catalog number | Company name | Dilution<br>for WB |
|--------------------------------------------------|----------------|--------------|--------------------|
| <b>Human</b>                                     |                |              |                    |
| Histidine-rich glycoprotein (HRG)                | AF1905         | R&D          | 1:1000             |
| Clusterin                                        | Sc-6419        | Santa Cruz   | 1:500              |
| Vitronectin                                      | Sc-28929       | Santa Cruz   | 1:1000             |
| Platelet factor 4 (PF4)                          | Sc-374195      | Santa Cruz   | 1/1000             |
| Glutathione peroxidase 3 (GPX-3)                 | AF4199         | R&D          | 1:1000             |
| Complement component 1q<br>subcomponent B (C1qB) | PA5-35369      | Pierce       | 1 :1000            |
| Fibronectin                                      | Sc-6952        | Santa Cruz   | 1:1000             |
| <b>Mouse</b>                                     |                |              |                    |
| Platelet factor 4 (PF4)                          | AF595          | R&D          | 1:1000             |
| Clusterin                                        | Sc-6419        | Santa Cruz   | 1:500              |
| Vitronectin                                      | Sc-28929       | Santa Cruz   | 1:1000             |
| Anti-thrombin III                                | Ab126598       | Abcam        | 1:1000             |
